# Supplementary material for: Atmospheric transport simulations in support of the Carbon in Arctic Reservoirs Vulnerability Experiment (CARVE)
Source: Copernicus journal article supplement (doi:10.5194/acp-15-4093-2015), 2015-04-21
Supplement: Supplementary file 2 [file acp-15-4093-2015-supplement.zip]

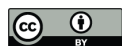

## *Supplement of*

# **Atmospheric transport simulations in support of the Carbon in Arctic Reservoirs Vulnerability Experiment (CARVE)**

**J. M. Henderson et al.**

*Correspondence to:* J. M. Henderson ([jhenderson@aer.com](mailto:jhenderson@aer.com))

- [acp-15-4093-2015-supplement-cover-letter.pdf](#)
- [Sf01.pdf](#)
- [Sf02.pdf](#)
- [Sf03.pdf](#)
- [Sf04.pdf](#)
- [suppl-acp-2014-747-20150407-toACP-productionrevised.docx](#)
- [suppl-acp-2014-747-20150407-toACP-productionrevised.pdf](#)
