# Supplementary figures and images for: Atmospheric transport simulations in support of the Carbon in Arctic Reservoirs Vulnerability Experiment (CARVE)
Source: Copernicus journal article supplement (doi:10.5194/acp-15-4093-2015), 2015-04-21

# WRF v3.4.1 2012 Dewpoint Temperature RMS Error

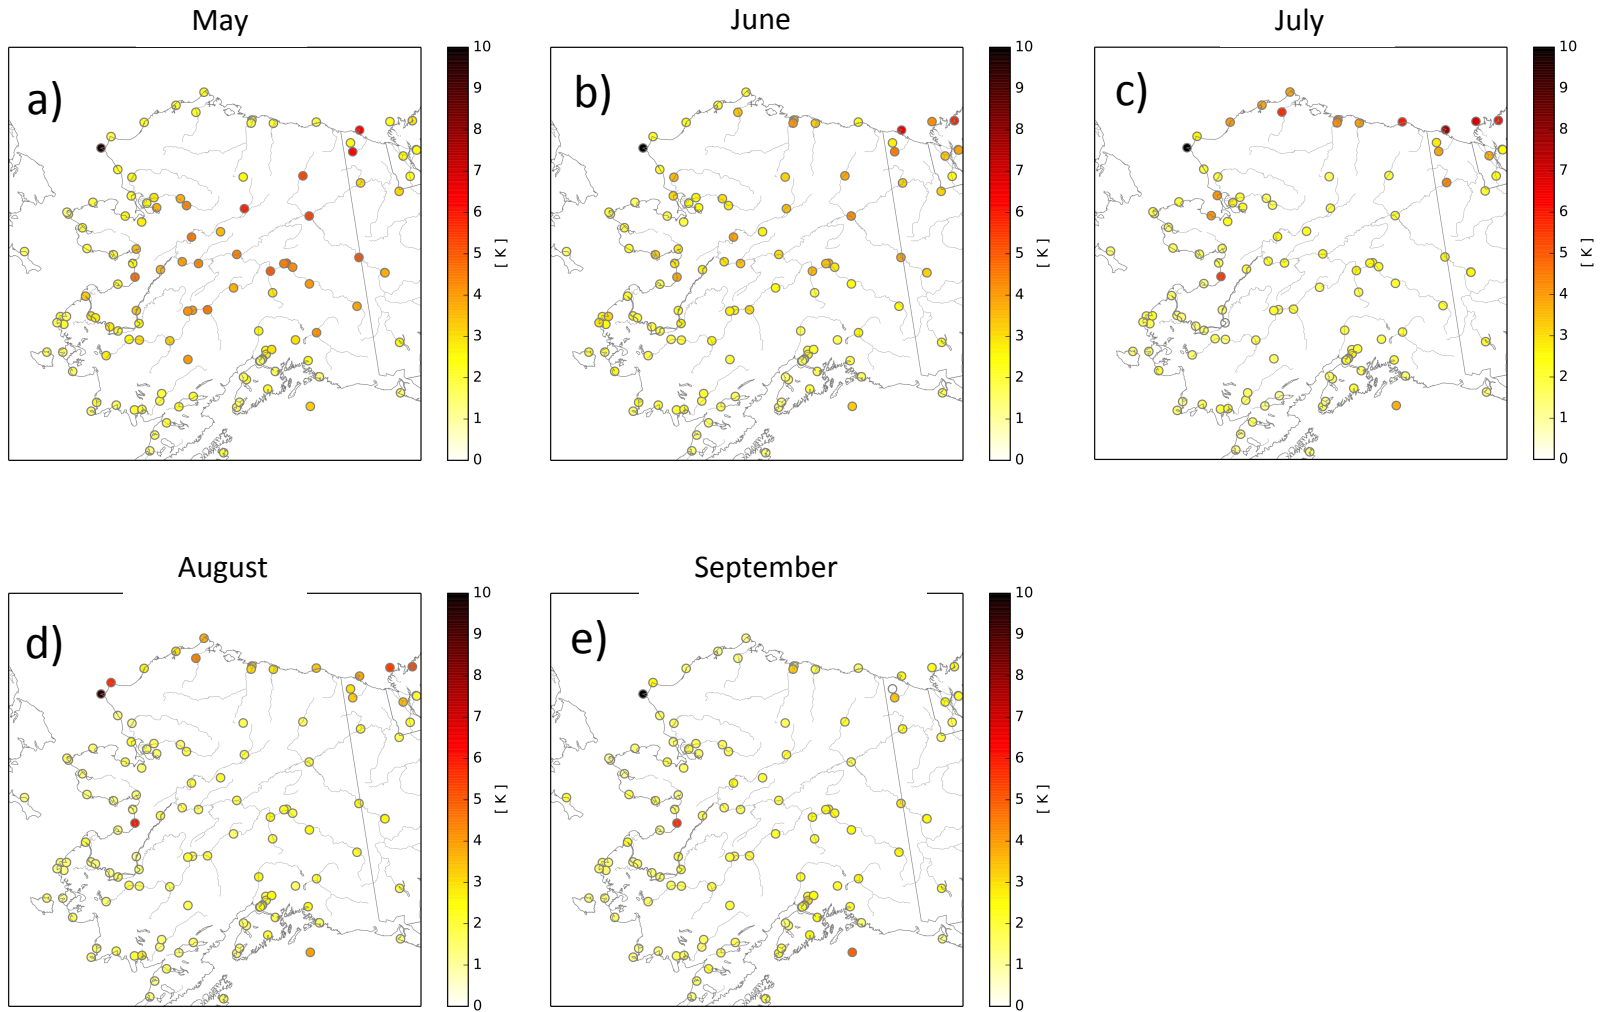

Supplement: Supplementary file 1 [file acp-15-4093-2015-supplement.zip]

# WRF v3.4.1 2012 Temperature RMS Error

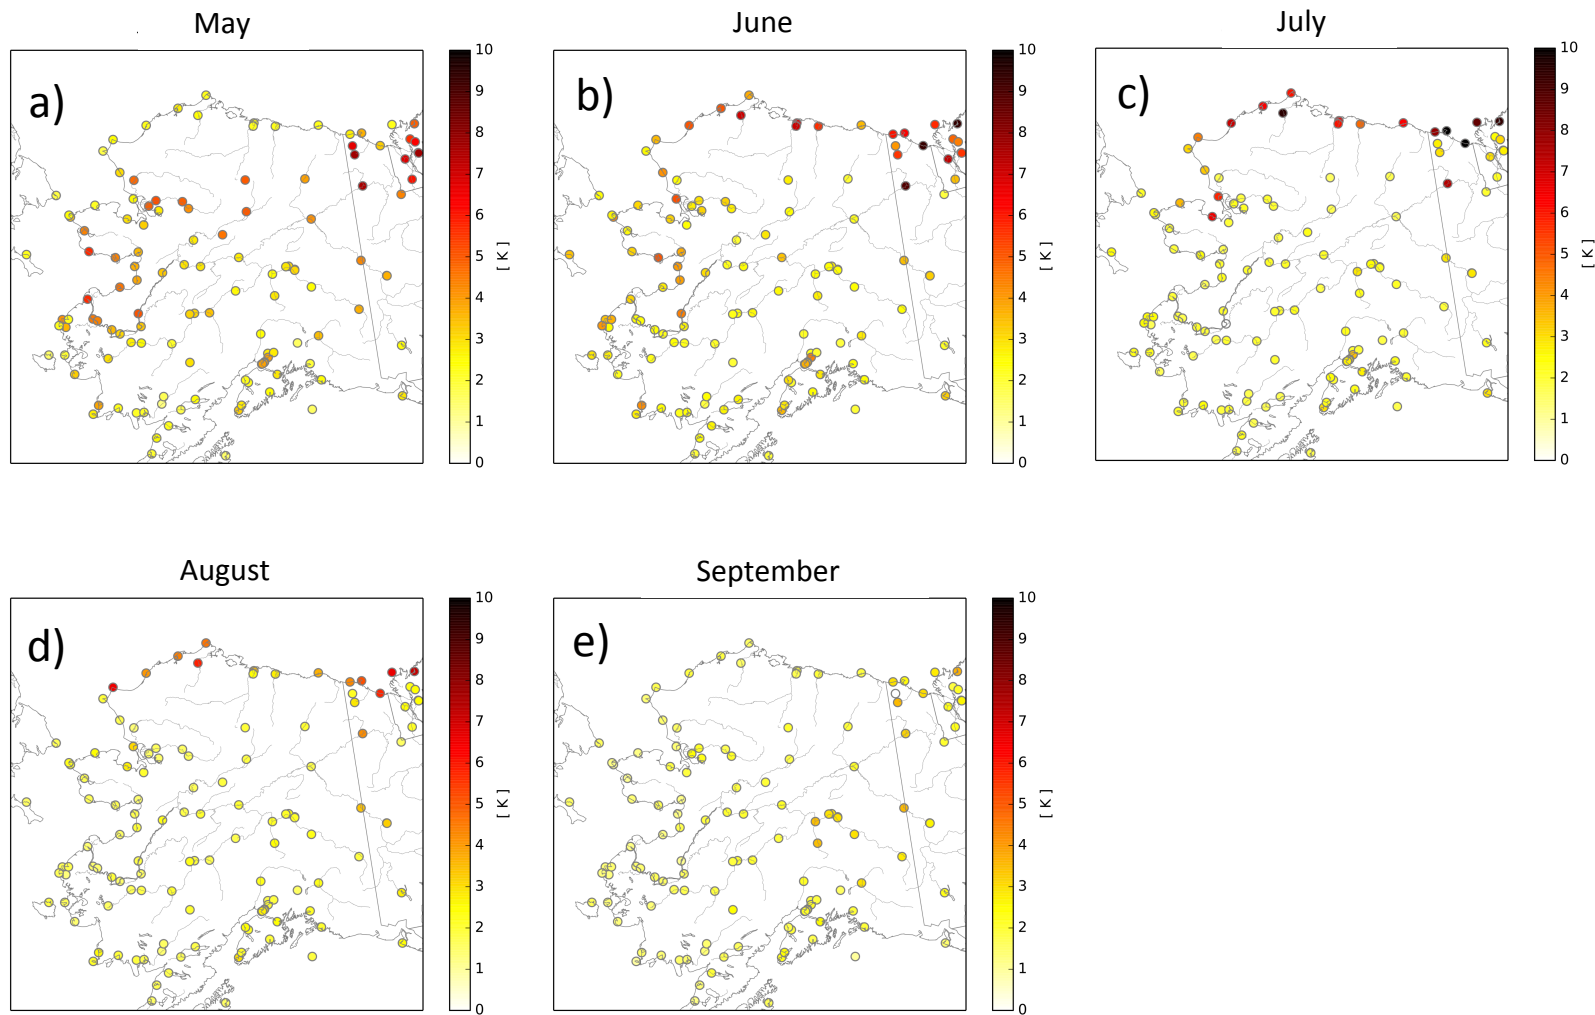

Supplement: Supplementary file 3 [file acp-15-4093-2015-supplement.zip]

# WRF v3.4.1 2012 Temperature Bias

May

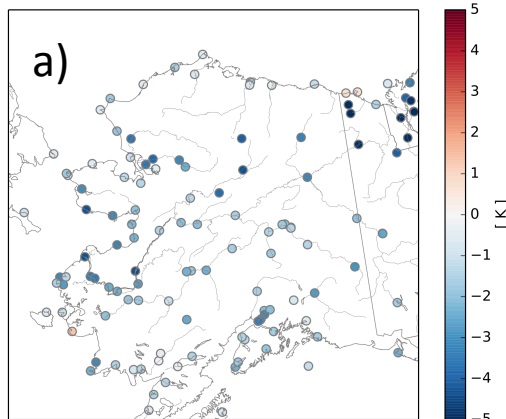

June

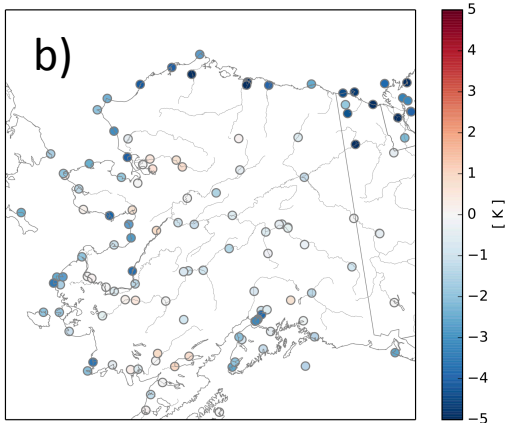

July

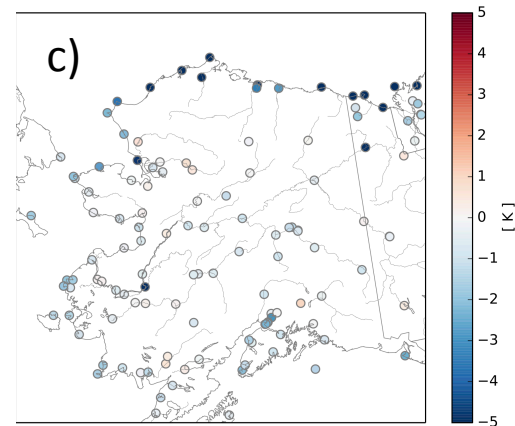

August

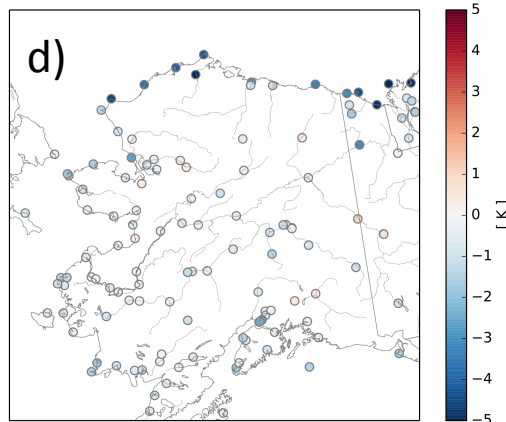

September

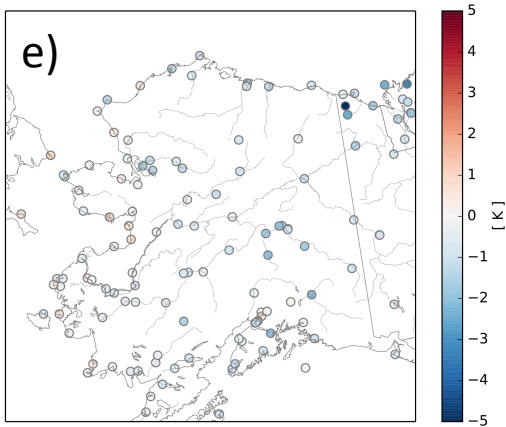

Supplement: Supplementary file 4 [file acp-15-4093-2015-supplement.zip]

# WRF v3.4.1 2012 Dewpoint Temperature Bias

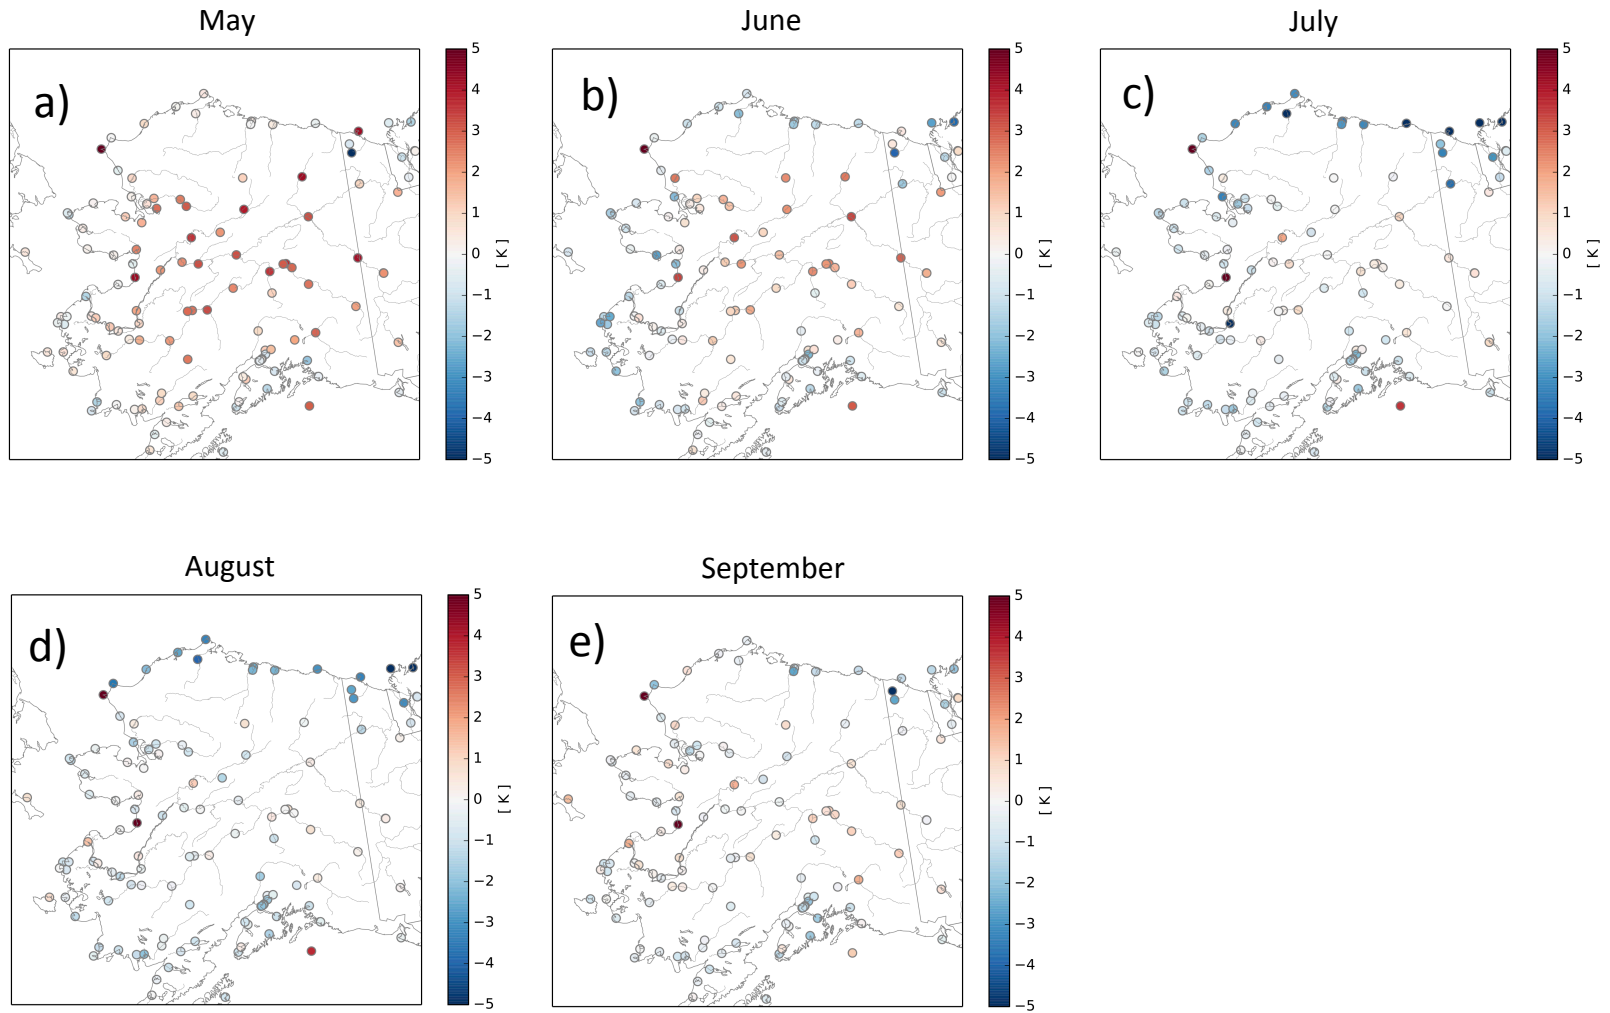

Supplement: Supplementary file 6 [file acp-15-4093-2015-supplement.zip]
